# Supplementary material for: Choice of respiratory therapy for COVID-19 patients with acute hypoxemic respiratory failure: a retrospective case series study
Source: PeerJ journal article supplement (doi:10.7717/peerj.15174), 2023-04-10
Supplement: Fig_S1.pdf [file Fig_S1.pdf]

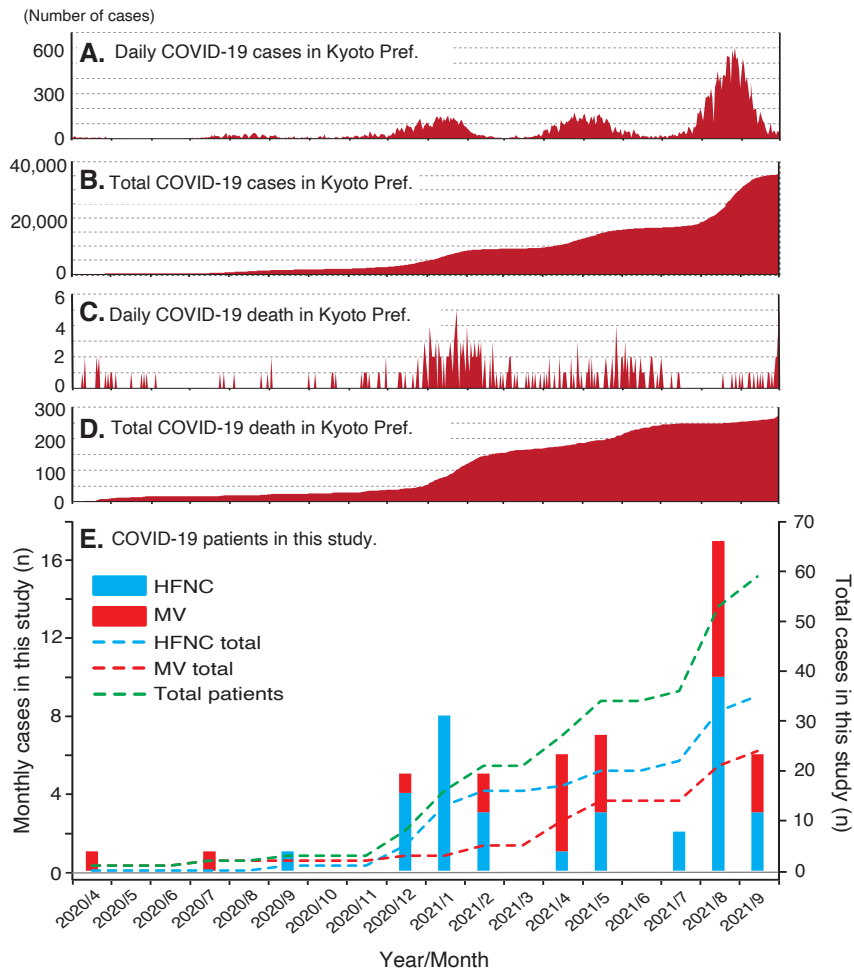

**Fig. S1.** The statistics of COVID-19 cases in Kyoto Prefecture and monthly COVID-19 patients in this study. **A.** Daily new COVID-19 cases in Kyoto Pref. **B.** Total COVID-19 cases in Kyoto Pref. **C.** Daily COVID-19 death in Kyoto Pref. **D.** Total COVID-19 death in Kyoto Pref. **E.** COVID-19 patients in this study. HFNC, High flow nasal cannula; MV, mechanical ventilation; ROX index, the ratio of oxygen saturation index. statistics of COVID-19 patients in Kyoto Prefecture.
