# Supplementary material for: Choice of respiratory therapy for COVID-19 patients with acute hypoxemic respiratory failure: a retrospective case series study
Source: PeerJ journal article supplement (doi:10.7717/peerj.15174), 2023-04-10
Supplement: Fig_S3.pdf [file Fig_S3.pdf]

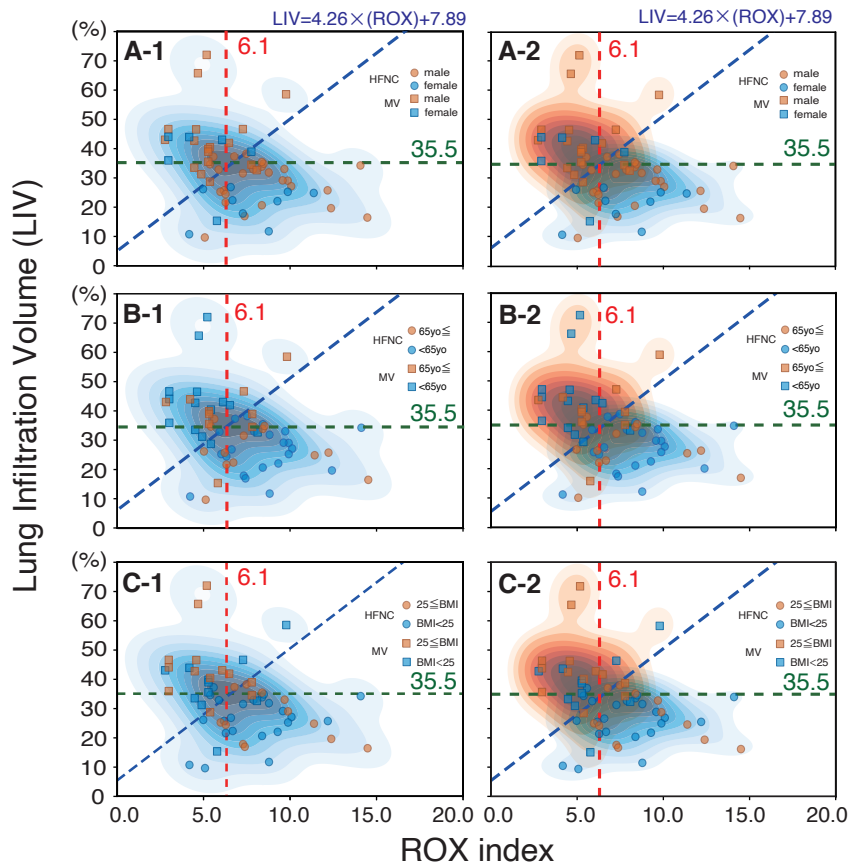

**Supplementary Fig. 3.** Kernel density estimation of patient distribution A; gender, B; age ( $\geq 65$ ,  $65 >$ ), C; BMI ( $\geq 25$ ,  $25 >$ ). The borderline to classify patients with HFNC and ventilatory management was  $(LIV) = 4.51 \times (ROX \text{ index}) + 1.75$ . ROX index and LIV were significant in multiple logistic regression analyses. BMI, body mass index; HFNC, High flow nasal cannula; LIV, lung infiltration volume; MV, mechanical ventilation; ROX index, the ratio of oxygen saturation index.
