# Supplementary material for: Choice of respiratory therapy for COVID-19 patients with acute hypoxemic respiratory failure: a retrospective case series study
Source: PeerJ. 2023 Apr 10;11:e15174. doi: 10.7717/peerj.15174 (PMC10100803; doi:10.7717/peerj.15174)
Supplement: Supplemental Information 1 [file peerj-11-15174-s001.pdf]

**Table S1.** Complications of HFNC and MV groups

| characteristics               | HFNC     | MV       | <i>p</i> -value |
|-------------------------------|----------|----------|-----------------|
| Complications                 |          |          |                 |
| smoking history, n (%)        | 15 (43%) | 14 (58%) | 0.286           |
| hypertension, n (%)           | 14 (40%) | 12 (50%) | 0.447           |
| diabetes, n (%)               | 18 (51%) | 12 (50%) | 0.914           |
| chronic kidney disease, n (%) | 7 (20%)  | 12 (50%) | 0.015*          |
| chronic heart failure, n (%)  | 4 (11%)  | 2 (8.3%) | 1.000           |
| chronic lung disease n (%)    | 2 (6%)   | 2 (8.3%) | 1.000           |
| asthma, n (%)                 | 2 (6%)   | 1 (4.2%) | 1.000           |
| stroke, n (%)                 | 0 (0%)   | 2 (8.3%) | 0.407           |

\* $p < 0.05$ , statistically significant difference between HFNC and MV. HFNC, high flow nasal cannula; MV, mechanical ventilation.
