# Supplementary material for: Choice of respiratory therapy for COVID-19 patients with acute hypoxemic respiratory failure: a retrospective case series study
Source: PeerJ. 2023 Apr 10;11:e15174. doi: 10.7717/peerj.15174 (PMC10100803; doi:10.7717/peerj.15174)
Supplement: Supplemental Information 15 [file peerj-11-15174-s015.xlsx]

## Sheet: 59_cases
ResipratoryTherapy	ROX index	LIV (%)	Gender	Age	BMI	WBC (/µL)	Cr (mg/dL)	CRP (mg//dL)	LDH (U/L)	d-dimer (µg/L)	PSI	CCI	Days to Hostital (days)	Days to HFNC (days)	Mortality
High-flow Nasal Cannulation	9.9	29.2	male	53	34.7755	12600	0.97	9.4	327	0.6	53	1	4	9	survivied
High-flow Nasal Cannulation	11.4	25	female	74	25.8997	5500	0.8	14.73	459	1.4	114	4	9	9	survivied
High-flow Nasal Cannulation	9.3	22.2	female	43	24.9108	7600	0.6	12.27	375	1.1	43	0	8	8	survivied
High-flow Nasal Cannulation	6.7	22.5	female	72	18.5333	19500	0.66	4.9	378	0.7	72	1	11	10	survivied
High-flow Nasal Cannulation	5.9	33	male	59	24.8382	9500	0.59	14.15	475	36	79	1	13	12	survivied
High-flow Nasal Cannulation	12.4	19.8	male	52	32.872	2200	0.75	4.92	344	0.3	62	1	11	8	survivied
High-flow Nasal Cannulation	7.3	31.7	male	72	23.6203	4500	0.76	18.77	466	0.6	82	2	9	12	survivied
High-flow Nasal Cannulation	5.1	9.8	male	69	19.2035	13200	0.66	3.41	367	0.6	139	4	12	9	survivied
High-flow Nasal Cannulation	7.3	18	female	57	33.5156	25600	0.53	4.64	417	0.8	77	2	9	7	survivied
High-flow Nasal Cannulation	5	26.3	female	83	23.0263	11700	0.53	11.97	403	0.9	103	1	7	6	survivied
High-flow Nasal Cannulation	5.4	34.8	male	76	24.3764	2900	0.63	9.09	413	26.2	86	1	12	12	survivied
High-flow Nasal Cannulation	6.2	25.9	male	69	21.9651	5500	10.63	8.95	376	1.5	129	6	12	12	survivied
High-flow Nasal Cannulation	12.2	25.9	male	66	21.1621	2400	0.85	2.71	379	0.9	126	10	6	6	survivied
High-flow Nasal Cannulation	8.4	34	male	84	21.6049	7200	1.41	20.22	349	6.5	124	2	13	14	survivied
High-flow Nasal Cannulation	14.5	16.6	male	81	25.2343	6200	0.87	3.21	345	3.2	121	1	9	17	survivied
High-flow Nasal Cannulation	8.8	32	male	49	20.9395	12400	0.97	0.94	429	2.6	79	0	10	13	survivied
High-flow Nasal Cannulation	6.6	27	female	60	24.6755	9500	0.52	4.34	411	0.9	80	2	10	9	survivied
High-flow Nasal Cannulation	5.6	37.4	male	80	21.83	4300	0.89	15.39	351	0.6	90	0	9	10	survivied
High-flow Nasal Cannulation	8.5	35	male	73	19.082	6000	0.75	8.27	552	1.5	83	0	9	9	survivied
High-flow Nasal Cannulation	4.2	10.9	female	47	23.4107	5800	0.94	0.66	226	0.5	47	0	5	12	survivied
High-flow Nasal Cannulation	7.4	17.1	male	55	25.7572	14800	0.68	32.16	320	0.6	105	1	9	8	survivied
High-flow Nasal Cannulation	8.8	11.9	female	55	22.6409	11300	0.44	16.38	598	0.7	75	1	11	11	survivied
High-flow Nasal Cannulation	8.4	20.8	male	55	21.4908	6100	0.68	0.55	302	0.6	65	0	7	7	survivied
High-flow Nasal Cannulation	9.7	33.2	male	56	29.2011	16300	0.83	3.87	348	0.6	66	2	6	6	survivied
High-flow Nasal Cannulation	9.6	29.3	male	52	24.0055	5300	0.57	10.98	328	0.5	62	0	12	8	survivied
High-flow Nasal Cannulation	14.1	34.4	male	58	24.8591	6500	0.83	1.87	438	0.8	68	0	11	11	survivied
High-flow Nasal Cannulation	8.4	35.6	male	45	31.7083	15000	0.86	14.76	418	0.8	65	1	10	10	survivied
High-flow Nasal Cannulation	10.1	27.3	male	61	24.9649	3000	0.52	8.92	341	2.2	71	1	8	8	survivied
High-flow Nasal Cannulation	6	25.4	male	43	33.5153	5500	0.66	0.57	387	0.7	73	1	17	17	survivied
High-flow Nasal Cannulation	7.5	38.4	male	47	28.7037	6800	0.73	2.9	460	0.9	77	2	14	10	survivied
High-flow Nasal Cannulation	6.3	24.6	male	59	25.8953	10100	1.74	17.37	398	1.1	129	2	10	9	survivied
High-flow Nasal Cannulation	6.8	37.5	male	51	27.8828	2000	1.13	8.89	429	0.6	131	4	8	7	survivied
High-flow Nasal Cannulation	9.9	25.4	female	45	20.6698	1800	0.68	2.93	517	0.8	55	1	9	9	survivied
High-flow Nasal Cannulation	7.9	33.1	male	59	23.8751	5300	0.68	8.46	417	0.6	69	1	7	7	survivied
High-flow Nasal Cannulation	6.3	21.8	male	77	18.7783	5100	1.55	21.28	352	2.6	137	3	11	11	survivied
Mechanical Ventilation	4.6	46.7	male	45	29.6935	7100	0.89	12.69	315	8.3	45	1	16	5	survivied
Mechanical Ventilation	6.1	43.2	female	39	25.1405	5600	0.37	2.01	122	0.7	29	0	2	10	survivied
Mechanical Ventilation	2.8	43.2	male	77	22.1892	5400	1.5	11.57	772	1.9	147	3	8	8	survivied
Mechanical Ventilation	7.8	39.1	female	81	27.2109	10500	1.37	16.93	372	2.8	151	2	4	3	survivied
Mechanical Ventilation	9.8	58.7	male	70	24.3893	15400	5.75	5.75	437	2.3	170	8	10	9	died
Mechanical Ventilation	7.3	46.8	male	80	17.6417	1500	3.38	11.46	855	20.6	245	7	7	7	died
Mechanical Ventilation	5.3	35.7	male	73	21.7301	11600	1.51	2.28	509	0.8	173	2	11	9	survivied
Mechanical Ventilation	6.5	42.1	male	45	32.112	16900	0.92	11.25	343	0.8	75	2	12	11	survivied
Mechanical Ventilation	5.4	40.6	male	52	27.3438	5200	0.77	1.52	496	0.7	82	2	8	7	survivied
Mechanical Ventilation	5.3	40	male	72	23.614	12500	1.22	13.27	448	2.2	112	2	6	5	survivied
Mechanical Ventilation	4.9	31.4	male	64	21.5682	3200	0.67	5.58	418	0.9	94	2	9	8	survivied
Mechanical Ventilation	4.5	42.9	male	50	40.0833	9200	1.11	8.23	578	1.2	70	2	8	7	survivied
Mechanical Ventilation	5.4	28.9	male	64	29.3221	10300	10.55	31.15	429	1.1	184	3	7	7	died
Mechanical Ventilation	3	46.8	male	51	27.7575	2400	0.79	4.95	449	1.2	81	2	6	4	died
Mechanical Ventilation	5.8	15.5	female	69	22.1484	5700	2.27	4.93	330	0.5	89	1	7	10	survivied
Mechanical Ventilation	7.8	34.7	male	68	26.8566	6900	0.71	1.21	960	2.1	78	2	6	5	survivied
Mechanical Ventilation	5.3	39.1	male	68	22.526	4200	0.62	7.4	719	1.5	78	0	11	11	survivied
Mechanical Ventilation	4.2	44.1	female	69	23.1641	6600	1.66	4.93	320	0.7	119	4	3	13	survivied
Mechanical Ventilation	5.2	72.2	male	46	25.989	12200	1.24	17.52	1086	21.7	66	0	5	6	survivied
Mechanical Ventilation	3	44.2	female	41	29.6358	2500	0.65	3.71	689	0.7	91	0	4	4	survivied
Mechanical Ventilation	4.7	65.9	male	48	25.0593	7700	1.14	19.05	436	0.7	88	1	6	7	survivied
Mechanical Ventilation	3	36.1	female	44	48.1112	6700	0.8	22.47	744	0.8	105	1	7	8	survivied
Mechanical Ventilation	8.1	32.8	male	36	23.7728	3800	0.75	14.07	872	2.2	46	0	8	8	survivied
Mechanical Ventilation	4.5	33.7	male	40	21.1327	13500	0.76	20.8	681	2.5	50	0	9	8	survivied
