# Supplementary material for: Choice of respiratory therapy for COVID-19 patients with acute hypoxemic respiratory failure: a retrospective case series study
Source: PeerJ journal article supplement (doi:10.7717/peerj.15174), 2023-04-10
Supplement: Table_S2.pdf [file Table_S2.pdf]

**Table S2.** Therapeutic interventions of HFNC and MV groups

| Interventions                                              | HFNC, n(%) | MV,n(%)   | <i>p</i> -value |
|------------------------------------------------------------|------------|-----------|-----------------|
| Favipiravir                                                |            |           |                 |
| Favipiravir                                                | 0 (0%)     | 1 (4.2%)  | 0.407           |
| Favipiravir+Heparin+Dexamethasone                          | 2 (5.7%)   | 2 (8.3%)  | 1.000           |
| Favipiravir+Heparin+Dexamethasone+Steroid pulse            | 1 (2.9%)   | 0 (0%)    | 1.000           |
| Remdesivir                                                 |            |           |                 |
| Remdesivir+Heparin+Dexamethasone                           | 10 (28.6%) | 3 (12.5%) | 0.143           |
| Remdesivir+Heparin+Dexamethasone+Baricitinib               | 7 (20.0%)  | 7 (29.2%) | 0.416           |
| Remdesivir+Heparin+Dexamethasone+Steroid pulse             | 1 (2.9%)   | 0 (0%)    | 1.000           |
| Remdesivir+Heparin+Dexamethasone+Tocilizumab               | 5 (14.3%)  | 7 (29.2%) | 0.198           |
| Remdesivir+Heparin+Dexamethasone+Steroid pulse+Baricitinib | 1 (2.9%)   | 0 (0%)    | 1.000           |
| Remdesivir+Heparin+Steroid pulse                           | 0 (0%)     | 1 (4.2%)  | 0.407           |
| Favipiravir+Remdesivir                                     |            |           |                 |
| Favipiravir+Remdesivir+Heparin+Dexamethasone               | 6 (17.1%)  | 3 (12.5%) | 0.725           |
| Favipiravir+Remdesivir+Heparin +Dexamethasone+Tcilizumab   | 1 (2.9%)   | 0 (0%)    | 1.000           |
| Favipiravir+Remdesivir+Heparin +Dexamethasone+Baricitinib  | 1 (2.9%)   | 0 (0%)    | 1.000           |

HFNC, high flow nasal cannula; MV, mechanical ventilation.
