# Supplementary material for: Choice of respiratory therapy for COVID-19 patients with acute hypoxemic respiratory failure: a retrospective case series study
Source: PeerJ journal article supplement (doi:10.7717/peerj.15174), 2023-04-10
Supplement: Table_S3.pdf [file Table_S3.pdf]

**Table. S3.** Clinical outcomes of HFNC and MV groups after admission

| characteristics                                                                             | HFNC                   | MV                     | <i>p</i> -value |
|---------------------------------------------------------------------------------------------|------------------------|------------------------|-----------------|
| hospital stay, days, mean $\pm$ sd (range)                                                  | 13.2 $\pm$ 10.3 (4-63) | 24.1 $\pm$ 21.2 (5-97) | 0.032*          |
| Period from onset to the introduction of ventilator management, days, mean $\pm$ sd (range) |                        | 10.3 $\pm$ 4.3 (4-22)  |                 |
| Period from HFNC to mechanical ventilation, days, mean $\pm$ sd (range)                     |                        | 2.8 $\pm$ 3.6 (0-16)   |                 |
| Period of using HFNC, days, mean $\pm$ sd (range)                                           | 7.1 $\pm$ 10.3 (1-62)  |                        |                 |
| Period of using ventilation, days, mean $\pm$ sd (range)                                    |                        | 15.2 $\pm$ 23.6 (2-97) |                 |

\**p*<0.05, statistically significant difference between HFNC and MV. HFNC, high flow nasal cannula; MV, mechanical ventilation.
