# Supplementary material for: Choice of respiratory therapy for COVID-19 patients with acute hypoxemic respiratory failure: a retrospective case series study
Source: PeerJ journal article supplement (doi:10.7717/peerj.15174), 2023-04-10
Supplement: Table_S4.pdf [file Table_S4.pdf]

**Table S4** Classification by ROX index and/or LIV, and HFNC/MV ratios and mortality

| Category  | Mild cases, n/subtotal (%) |               |                                   | Severe cases, n/subtotal (%) |               |                                   | Total,<br>n/subtotal (%) |
|-----------|----------------------------|---------------|-----------------------------------|------------------------------|---------------|-----------------------------------|--------------------------|
|           | ROX index                  | LIV           | LIV<                              | ROX index                    | LIV           | LIV≥                              |                          |
|           | >6.1                       | ≥35.5%        | $4.26 \times (\text{ROX}) + 7.89$ | ≤6.1                         | ≥35.5%        | $4.26 \times (\text{ROX}) + 7.89$ |                          |
| HFNC      | 28/35 (80.0%)              | 31/35 (88.6%) | 32/35(91.4%)                      | 7/35 (20.0%)                 | 4/35 (11.4%)  | 3/35 (8.6%)                       | 35/59 (59.3%)            |
| MV        | 6/24 (25.0%)               | 6/24 (25.0%)  | 5/24 (20.8%)                      | 18/24 (75.0%)                | 18/24 (75.0%) | 19/24 (79.2%)                     | 24/59 (40.7%)            |
| Total     | 34/59 (57.6%)              | 37/59 (62.7%) | 37/59 (62.7%)                     | 25/59 (42.4%)                | 22/59 (37.3%) | 22/59 (37.3%)                     | 59/59 (100%)             |
| Mortality | 2/34 (5.9%)                | 1/37 (2.7%)   | 1/37 (2.7%)                       | 2/25 (8.0%)                  | 3/22 (13.6%)  | 3/22 (13.6%)                      | 4/59 (6.8%)              |

HFNC, high-flow nasal cannula; LIV, lung infiltration volume; MV, mechanical ventilation; ROX index, ratio of oxygen saturation index.
