# Supplementary material for: Choice of respiratory therapy for COVID-19 patients with acute hypoxemic respiratory failure: a retrospective case series study
Source: PeerJ journal article supplement (doi:10.7717/peerj.15174), 2023-04-10
Supplement: Table_S5.pdf [file Table_S5.pdf]

**Table S5** Classification by ROX index and/or LIV, and the positive ratios of HFNC or MV

| Category | Mild cases                    |                |                     | Severe cases                |               |                     |
|----------|-------------------------------|----------------|---------------------|-----------------------------|---------------|---------------------|
|          | HFNC positive, n/subtotal (%) |                |                     | MV positive, n/subtotal (%) |               |                     |
|          | ROX index >6.1                | 35.5%>LIV      | LIV<4.26×(ROX)+7.89 | ROX index ≤6.1              | 35.5%≥LIV     | LIV≥4.26×(ROX)+7.89 |
| Male     | 21/28 (75.0%)                 | 22/31 (71.0%)  | 23/32 (71.9%)       | 13/18 (72.2%)               | 13/18 (72.2%) | 15/19 (78.9%)       |
| Female   | 7/28 (25.0%)                  | 9/31 (29.0%)   | 9/32 (28.1%)        | 5/18 (27.8%)                | 5/18 (27.8%)  | 4/19 (21.1%)        |
| Total    | 28/28 (100%)                  | 31/31 (100%)   | 32/32 (100%)        | 18/18 (100%)                | 18/18 (100%)  | 21/21 (100%)        |
| ≥65 yo   | 9/28 (32.1%)                  | 12/31 (38.7%)  | 11/32 (34.4%)       | 6/18 (33.3%)                | 8/18 (44.4%)  | 7/19 (36.8%)        |
| <65 yo   | 19/28 (67.9%)                 | 19/31 (61.3%)  | 21/32 (65.6%)       | 12/18 (66.7%)               | 10/18 (55.6%) | 12/19 (63.2%)       |
| Total    | 28/28 (100%)                  | 31/31 (100%)   | 31/31 (100%)        | 18/18 (100%)                | 18/18 (100%)  | 19/19 (100%)        |
| BMI >25  | 11/28 (39.3%)                 | 9/31 (29.0%)*  | 11/32 (34.4%)       | 10/18 (55.6%)               | 11/18 (61.1%) | 10/19 (52.6%)       |
| BMI ≤25  | 17/28 (60.7%)                 | 22/31 (71.0%)* | 21/32 (65.6%)       | 8/18 (44.4%)                | 7/18 (38.9%)  | 9/19 (47.4%)        |
| Total    | 28/28 (100%)                  | 31/31 (100%)   | 32/32 (100%)        | 18/18 (100%)                | 18/18 (100%)  | 19/19 (100%)        |

BMI, body mass index; HFNC, high-flow nasal cannula; LIV, lung infiltration volume; MV, mechanical ventilation; ROX index, ratio of oxygen saturation index; yo, years old. \* $p < 0.05$  compared with 35.5%≥LIV, MV positive with  $\chi^2$ -test
